# Supplementary material
Source: PubMed Central journal article supplement (PMC4745653)
Supplement: NIHMS747466-supplement-Table_S1.pdf [file NIHMS747466-supplement-Table_S1.pdf]

Supplementary Table S1

| Spot No. | Protein ID | Alternative names           | Mascot Score | Best peptide CI % | % Sequence coverage |
|----------|------------|-----------------------------|--------------|-------------------|---------------------|
| 1 ↓      | eIF5A1     | eIF-4D                      | 250          | 100.0             | 31.1                |
| 7 ↓      | Hsp27      | HspB-1, Hsp28               | 400          | 100.0             | 34.2                |
| 9 ↓      | NM23       | NDKA, NME1, NDPKA, NM23-H1A | 407          | 99.9              | 40.8                |
| 10 ↓     | DJ-1       | PARK7                       | 229          | 99.7              | 30.7                |
| 6 ↑      | PRDX2      | NKEFB, TDPX1                | 429          | 99.8              | 36.9                |
| 11 ↑     | TrpRS      | IFI53, IFP53, WRS, WARS     | 211          | 99.9              | 26.1                |

**Table S1. Identification of drug-dependent spots**

Spots from stained gels were diced and washed with 30% acetonitrile in 50 mM ammonium bicarbonate prior to DTT reduction and iodoacetamide alkylation (21). After trypsin digestion overnight at 37°C, proteins were analyzed by MALDI-TOF-TOF MS essentially as described previously (21) and identified by searching the combined MS and MS/MS spectra against the human NCBI database using a local MASCOT search engine (V. 1.9) on a GPS (V. 3.5, ABI) server. Mascot scores reflect the probability (P) that the observed match between the experimental data and the database sequence is a random event. Proteins containing at least one peptide with Confidence Interval (CI) value  $\geq 95\%$  were considered confidently identified. Arrows denote that the protein increased (↑) or decreased (↓) in response to both CPX and DEF.
